# Supplementary material for: Long-life reversible Li-CO2batteries with optimized Li2CO3flakes as discharge products on palladium-copper nanoparticles
Source: Royal Society of Chemistry journal article supplement (doi:10.1039/d1qi01583d), 2022-01-01
Supplement: d1qi01583d1.pdf [file d1qi01583d1.pdf]

## Supplementary Materials

### **A long-life reversible Li-CO<sub>2</sub> batteries with optimized Li<sub>2</sub>CO<sub>3</sub> flakes as discharge products on palladium-copper nanoparticles**

Hao Gong,<sup>a\*</sup> Xingyu Yu,<sup>b</sup> Yunyun Xu,<sup>b</sup> Bin Gao,<sup>b</sup> Hairong Xue,<sup>b</sup> Xiaoli Fan,<sup>c</sup> Hu Guo,<sup>d</sup> Tao Wang,<sup>b\*</sup> Jianping He<sup>b\*</sup>

<sup>a</sup> Department of Chemistry and Materials Science, College of Science, Nanjing Forestry University, Nanjing 210037, P. R. China. E-mail: gonghao@njfu.edu.cn

<sup>b</sup> College of Materials Science and Technology, Jiangsu Key Laboratory of Electrochemical Energy Storage Technologies, Nanjing University of Aeronautics and Astronautics, Nanjing 210016, PR China. E-mail: wangtao0729@nuaa.edu.cn and jianph@nuaa.edu.cn

<sup>c</sup> School of Materials Science and Engineering, Nanjing Institute of Technology, Nanjing 211167, P. R. China.

<sup>d</sup> School of New Energy, Nanjing University of Science and Technology, Jiangyin 214400, China

## Supplementary Figures and Tables

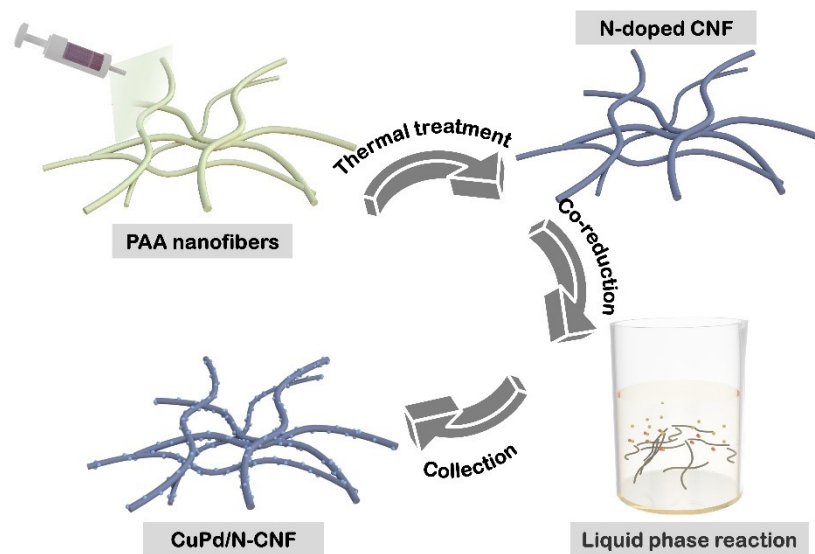

Fig. S1. Schematic diagram of CuPd/N-CNF sample

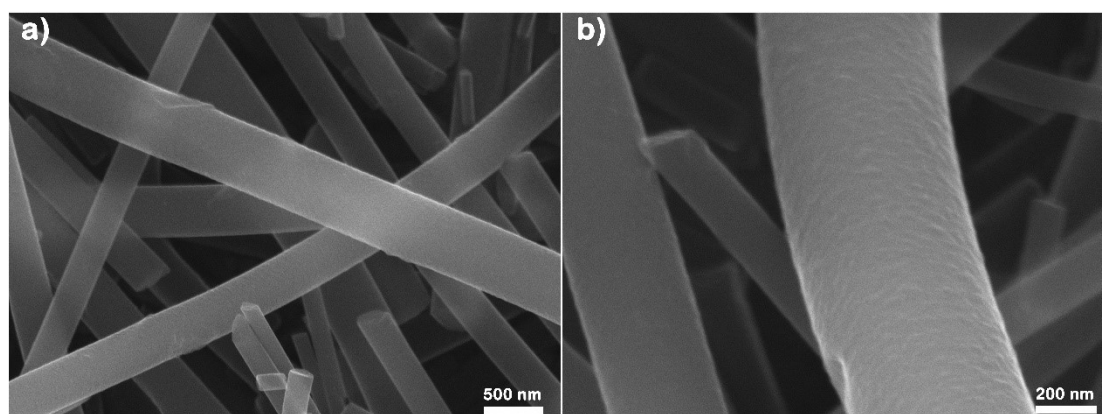

Fig. S2. SEM images of the PAA nanofiber after thermal treatment.

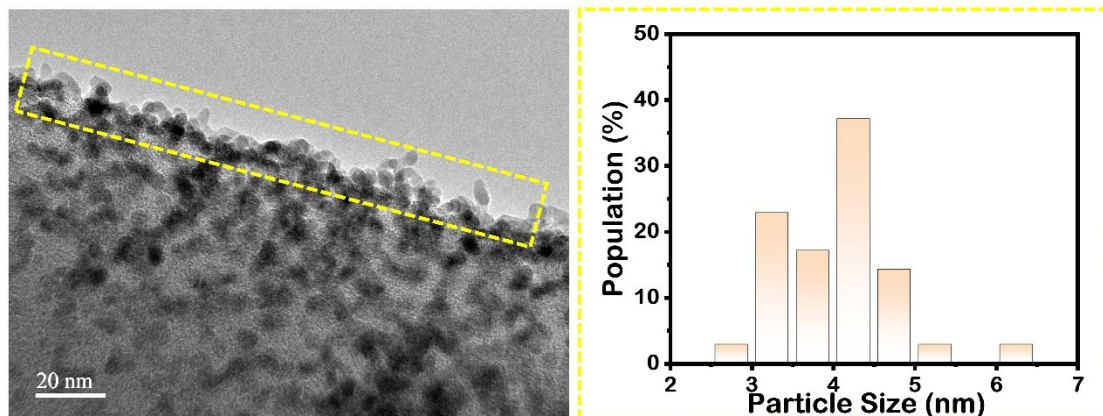

**Fig. S3.** The TEM images of the PdCu/N-CNF and the graph of particle size distribution obtained from the yellow marked area.

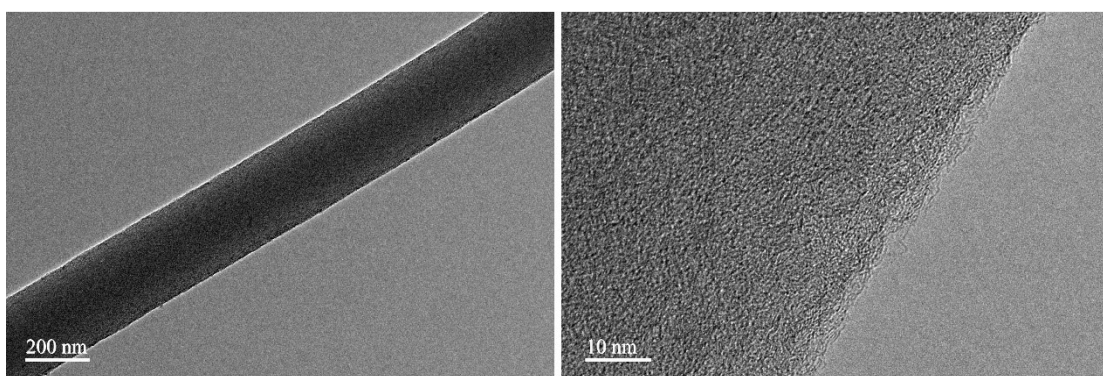

**Fig. S4.** HR-TEM images of the nitrogen-doped carbon nanofiber.

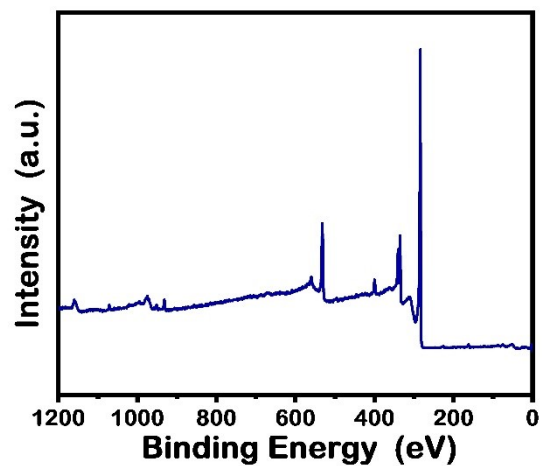

Fig. S5. The XPS survey spectra and C 1s spectra of the PdCu/N-CNF.

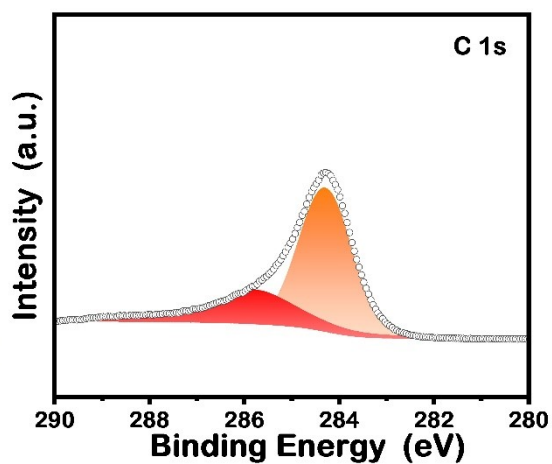

Fig. S6. The C 1s spectra of the PdCu/N-CNF.

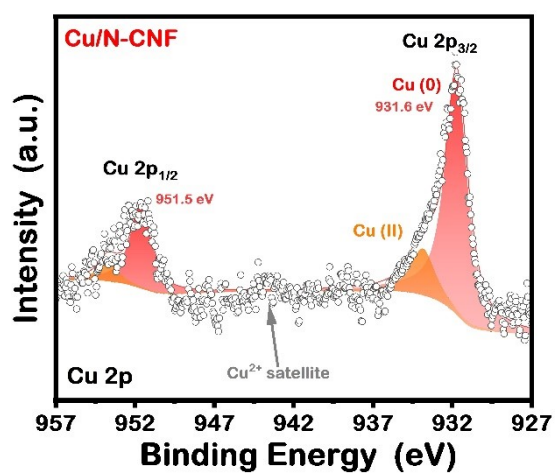

Fig. S7. The Cu 2p spectra of the Cu/N-CNF.

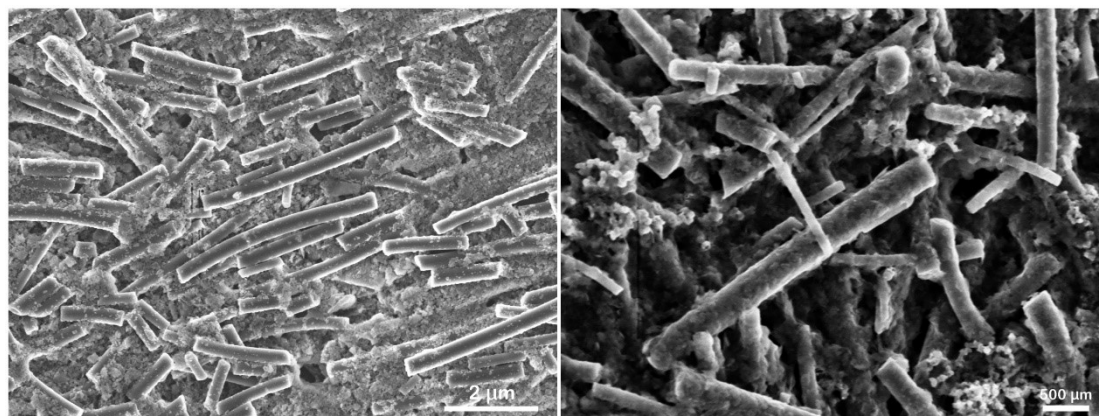

**Fig. S8.** The SEM analysis of cathode after discharged to 2.3 V.

Table S1. Comparison of the electrochemical performances of PdCu/N-CNF with reported cathode materials for Li-CO<sub>2</sub> batteries.

| Cathode                       | Capacity/mAh g <sup>-1</sup><br>(Current density/mA g <sup>-1</sup> ) | Cycle number<br>(Cycle time/hours) | Reference                                                          |
|-------------------------------|-----------------------------------------------------------------------|------------------------------------|--------------------------------------------------------------------|
| PdCu/N-CNF                    | 18550 (100)                                                           | >250 <sup>th</sup> (1350)          | This work                                                          |
| Ru/Co-CPY@CNT                 | 24740 (200)                                                           | 180 <sup>th</sup> (720)            | <i>Cell Reports Physical Science</i> <b>2021</b> , 2 (10), 100583. |
| Co-CeO <sub>2</sub> /Graphene | 7860 (100)                                                            | 100 <sup>th</sup> (1000)           | <i>Energy Storage Mater.</i> <b>2021</b> , 42, 484-492.            |
| RuRh/VC72                     | 9600 (200)                                                            | 180 <sup>th</sup> (360)            | <i>Matter</i> <b>2020</b> , 2 (6), 1494-1508.                      |
| Ru-Co/Graphene                | 13698 (200)                                                           | 100 <sup>th</sup> (500)            | <i>Adv. Energy Mater.</i> <b>2019</b> , 9 (8), 1802805.            |
| Co/GO                         | 17358 (100)                                                           | 100 <sup>th</sup> (1000)           | <i>Adv. Funct. Mater.</i> <b>2019</b> , 29 (49), 1904206.          |
| ZnS/N-rGO                     | 10310 (100)                                                           | 190 <sup>th</sup> (950)            | <i>Adv. Energy Mater.</i> <b>2019</b> , 9 (34), 1901806.           |
